A.

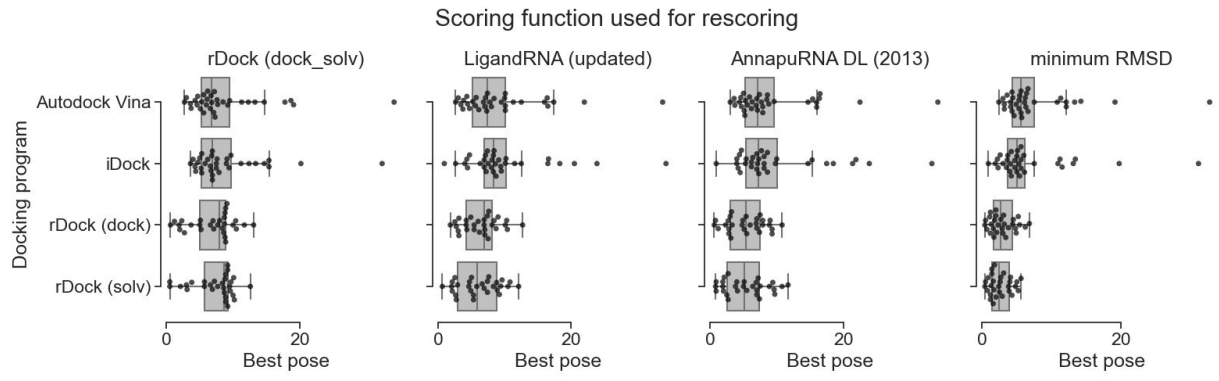

B.

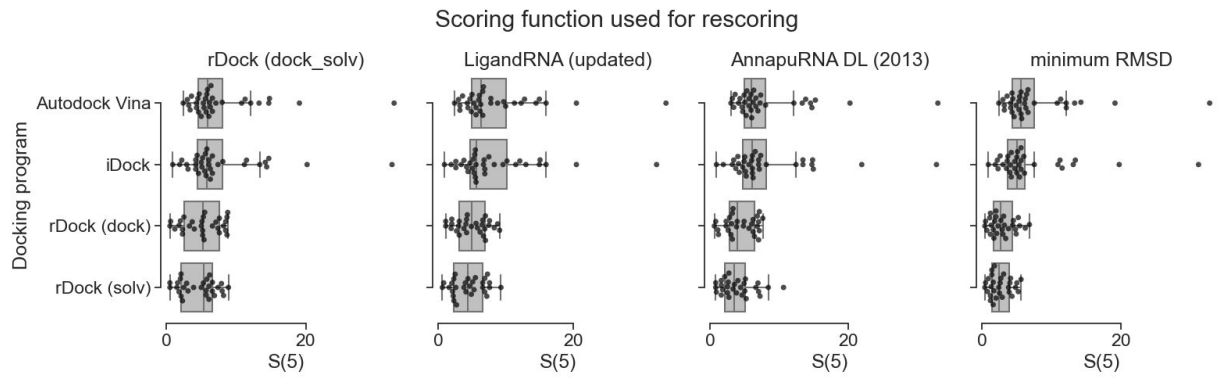

Source: https://storage.googleapis.com/plos-corpus-prod/10.1371/journal.pcbi.1008309/2/pcbi.1008309.s011.pdf
