| <b>pdb1</b> | <b>pdb2</b> | <b>seq identity</b> | <b>RNA RMSD</b> | <b>dataset1</b> | <b>dataset2</b> |
|-------------|-------------|---------------------|-----------------|-----------------|-----------------|
| 1NTA        | 1NTB        | 100.0               | 0.7             | 2013,2016       | 2013,2016       |
| 2EES        | 4FE5        | 97.0                | 2.3             | 2013,2016       | 2013,2016       |
| 2EEU        | 4FE5        | 97.0                | 4.8             | 2013,2016       | 2013,2016       |
| 2GIS        | 3GX5        | 97.9                | 0.9             | 2013,2016       | 2013,2016       |
| 2GIS        | 3IQR        | 98.9                | 1.2             | 2013,2016       | 2013,2016       |
| 3C44        | 3C7R        | 100.0               | 1.7             | 2013,2016       | 2013,2016       |
| 3D0U        | 3DIL        | 91.3                | 3.6             | 2013,2016       | 2013,2016       |
| 3DIL        | 3DJ2        | 100.0               | 4.1             | 2013,2016       | 2013,2016       |
| 3TD1        | 4K32        | 100.0               | 0.7             | 2013,2016       | 2016            |
| 2KTZ        | 2KU0        | 100.0               | 2.0             | 2016            | 2016            |
| 4F8U        | 4F8V        | 100.0               | 2.2             | 2016            | 2016            |
| 5BWS        | 5BXK        | 100.0               | 1.6             | 2016            | 2016            |
| 1AKX        | 1AJU        | 100.0               | 3.0             | 2013,2016       | testing         |
| 2ET4        | 1J7T        | 100.0               | 0.6             | 2013,2016       | testing         |
| 2F4S        | 2ET8        | 100.0               | 1.6             | 2013,2016       | testing         |
| 2OE8        | 2OE5        | 96.9                | 1.9             | 2013,2016       | testing         |
| 1FYP        | 1PBR        | 96.3                | 4.8             | testing         | testing         |
