| New structures in 2016 | Sequence identity to RNAs in 2013 |        |       | RMSD to RNAs in 2013 |       |       | Ligand similarity to ligands in 2013 |        |       |
|------------------------|-----------------------------------|--------|-------|----------------------|-------|-------|--------------------------------------|--------|-------|
|                        | min                               | max    | mean  | min                  | max   | mean  | min                                  | max    | mean  |
| 1F27                   | 0.00                              | 100.00 | 38.88 | 5.63                 | 31.93 | 16.60 | 3.52                                 | 43.41  | 30.43 |
| 1ZZ5                   | 0.00                              | 100.00 | 27.24 | 3.52                 | 35.55 | 21.17 | 2.82                                 | 86.00  | 49.19 |
| 2KD4                   | 0.00                              | 100.00 | 30.56 | 3.11                 | 32.30 | 13.98 | 0.77                                 | 24.84  | 17.25 |
| 2KGP                   | 0.00                              | 100.00 | 46.70 | 5.36                 | 25.54 | 15.54 | 2.03                                 | 63.07  | 37.36 |
| 2KTZ                   | 0.00                              | 91.43  | 31.49 | 6.19                 | 39.95 | 17.42 | 2.02                                 | 91.71  | 43.21 |
| 2KU0                   | 0.00                              | 91.43  | 31.49 | 5.72                 | 39.20 | 17.67 | 2.02                                 | 91.71  | 43.21 |
| 2KX8                   | 0.00                              | 100.00 | 37.01 | 5.24                 | 30.70 | 18.85 | 3.59                                 | 100.00 | 14.91 |
| 2L1V                   | 6.25                              | 100.00 | 41.76 | 5.37                 | 35.16 | 17.18 | 1.48                                 | 84.53  | 32.88 |
| 2L8H                   | 0.00                              | 100.00 | 40.94 | 4.44                 | 36.37 | 16.49 | 2.58                                 | 21.87  | 16.02 |
| 2L94                   | 58.33                             | 60.00  | 59.17 | 5.81                 | 51.37 | 18.29 | 3.29                                 | 24.81  | 17.23 |
| 2LWK                   | 61.29                             | 76.92  | 66.50 | 2.66                 | 32.64 | 16.88 | 2.44                                 | 56.44  | 35.00 |
| 2M4Q                   | 0.00                              | 100.00 | 67.51 | 4.91                 | 29.33 | 14.99 | 3.05                                 | 100.00 | 48.53 |
| 2MIY                   | 0.00                              | 75.00  | 40.11 | 11.95                | 36.66 | 20.74 | 1.48                                 | 84.53  | 32.88 |
| 2MXS                   | 62.96                             | 100.00 | 75.31 | 5.87                 | 33.89 | 16.01 | 3.30                                 | 100.00 | 49.22 |
| 2NPZ                   | 65.00                             | 65.00  | 65.00 | 7.98                 | 30.28 | 19.29 | 3.19                                 | 20.34  | 6.45  |
| 2XNZ                   | 0.00                              | 100.00 | 43.71 | 0.48                 | 34.20 | 18.60 | 2.03                                 | 29.61  | 9.61  |
| 3MIJ                   | 0.00                              | 66.67  | 34.77 | 5.34                 | 36.24 | 11.96 | 1.97                                 | 64.60  | 38.20 |
| 3Q3Z                   | 0.00                              | 58.33  | 38.44 | 11.74                | 46.84 | 28.10 | 2.25                                 | 95.05  | 47.97 |
| 3Q50                   | 14.29                             | 100.00 | 47.79 | 1.12                 | 31.66 | 17.00 | 1.48                                 | 84.53  | 32.88 |
| 3RKF                   | 0.00                              | 88.06  | 47.78 | 1.37                 | 46.97 | 21.63 | 1.24                                 | 65.81  | 27.47 |
| 3S4P                   | 0.00                              | 100.00 | 51.89 | 1.32                 | 31.04 | 15.71 | 3.12                                 | 89.24  | 48.59 |
| 3WRU                   | 0.00                              | 100.00 | 48.75 | 0.87                 | 31.98 | 15.47 | 2.93                                 | 85.22  | 48.44 |
| 4ERL                   | 0.00                              | 100.00 | 44.25 | 3.55                 | 47.02 | 21.25 | 0.74                                 | 100.00 | 6.85  |
| 4F8U                   | 0.00                              | 100.00 | 52.59 | 1.81                 | 37.18 | 16.05 | 2.67                                 | 87.28  | 46.75 |
| 4F8V                   | 0.00                              | 100.00 | 51.89 | 1.34                 | 30.95 | 15.64 | 2.67                                 | 87.28  | 46.75 |
| 4JF2                   | 9.09                              | 73.33  | 35.29 | 6.70                 | 41.77 | 21.86 | 1.48                                 | 84.53  | 32.88 |
| 4K32                   | 0.00                              | 100.00 | 55.87 | 0.73                 | 37.67 | 16.83 | 2.80                                 | 100.00 | 48.04 |
| 4LVW                   | 60.67                             | 100.00 | 80.06 | 0.68                 | 35.75 | 22.09 | 2.20                                 | 48.30  | 30.72 |
| 4LVX                   | 60.67                             | 100.00 | 80.06 | 0.83                 | 35.55 | 19.51 | 2.51                                 | 75.03  | 39.76 |
| 4LVY                   | 60.67                             | 100.00 | 80.06 | 0.66                 | 35.73 | 21.62 | 2.38                                 | 75.92  | 36.01 |
| 4LVZ                   | 60.67                             | 100.00 | 80.06 | 0.86                 | 35.79 | 19.54 | 1.03                                 | 100.00 | 27.48 |
| 4LX5                   | 0.00                              | 100.00 | 33.31 | 3.88                 | 38.11 | 18.78 | 0.98                                 | 54.27  | 21.51 |
| 4LX6                   | 0.00                              | 100.00 | 33.68 | 1.71                 | 38.30 | 20.08 | 1.55                                 | 52.01  | 23.44 |
| 4NFO                   | 0.00                              | 55.56  | 39.66 | 7.99                 | 34.96 | 19.16 | 1.35                                 | 100.00 | 10.39 |
| 4P5J                   | 7.69                              | 58.82  | 33.02 | 7.15                 | 37.08 | 20.00 | 1.35                                 | 100.00 | 10.39 |
| 4P95                   | 21.05                             | 60.87  | 46.66 | 5.06                 | 46.98 | 25.23 | 4.76                                 | 16.75  | 12.90 |
| 4PDQ                   | 0.00                              | 100.00 | 50.34 | 2.93                 | 34.35 | 17.06 | 2.76                                 | 84.07  | 49.00 |
| 4QK8                   | 29.41                             | 66.67  | 45.67 | 10.99                | 48.64 | 22.83 | 2.29                                 | 95.85  | 47.33 |
| 4QK9                   | 0.00                              | 66.67  | 48.66 | 11.28                | 38.48 | 24.18 | 2.29                                 | 95.85  | 47.33 |
| 4YAZ                   | 44.44                             | 60.00  | 53.11 | 9.53                 | 48.39 | 26.18 | 2.17                                 | 92.86  | 48.58 |

|             |       |       |       |       |       |       |      |       |       |
|-------------|-------|-------|-------|-------|-------|-------|------|-------|-------|
| <b>4YB0</b> | 37.50 | 60.00 | 50.37 | 9.22  | 45.27 | 23.73 | 2.25 | 95.05 | 47.97 |
| <b>4ZNP</b> | 41.67 | 67.67 | 53.74 | 11.73 | 54.27 | 23.41 | 2.45 | 78.83 | 43.51 |
| <b>5BWS</b> | 0.00  | 91.11 | 48.53 | 2.12  | 35.66 | 18.77 | 3.64 | 80.99 | 44.49 |
| <b>5BXK</b> | 0.00  | 90.91 | 48.79 | 2.21  | 34.04 | 20.12 | 3.64 | 80.99 | 44.49 |

Number of structures in the 2016 dataset with RNA identity to any structure from 2013:

< 90%: 16 structures

< 75%: 13 structures

< 50%: 0 structures

Number of structures in the 2016 dataset with RNA RMSD to any structure from 2013:

> 2 Å: 31 structures

> 5 Å: 21 structures

> 7 Å: 10 structures

> 10 Å: 5 structures

Number of structures in the 2016 dataset with ligand similarity to any structure from 2013:

< 99%: 36 structures

< 90%: 29 structures

< 75%: 14 structures

< 50%: 8 structures

< 25%: 5 structures
