| Distance binning step | Angle transformation and binning | S(3) |      |
|-----------------------|----------------------------------|------|------|
|                       |                                  | DL   | kNN  |
| -                     | -                                | 4.95 | 4.68 |
| 0.01                  | binning 0.005                    | 4.90 | 4.68 |
| 0.02                  | binning 0.010                    | 4.74 | 4.71 |
| 0.02                  | cos + binning 0.010              | 4.87 | 4.80 |
| 0.02                  | cos + binning 0.020              | 4.98 | 4.84 |
| 0.04                  | binning 0.02                     | 4.97 | 4.78 |
