| Scoring function | $w$  | S(1) | S(3) | Pareto rank |
|------------------|------|------|------|-------------|
| DL               | 0.00 | 5.60 | 4.63 | 1           |
| DL               | 0.01 | 5.29 | 4.86 | 1           |
| DL               | 0.02 | 5.34 | 4.86 | 1           |
| DL               | 0.05 | 5.34 | 4.86 | 1           |
| DL               | 0.10 | 5.27 | 4.86 | 1           |
| DL               | 0.50 | 5.22 | 4.74 | 1           |
| DL               | 1.00 | 5.42 | 4.65 | 1           |
| kNN              | 0.00 | 5.65 | 3.87 | 3           |
| kNN              | 0.01 | 6.04 | 3.92 | 1           |
| kNN              | 0.02 | 6.33 | 3.83 | 1           |
| kNN              | 0.05 | 6.33 | 3.99 | 2           |
| kNN              | 0.10 | 6.27 | 3.93 | 1           |
| kNN              | 0.50 | 6.23 | 3.71 | 3           |
| kNN              | 1.00 | 6.00 | 3.86 | 3           |
