| scoring function     | S(1)        | S(3)        | S(5)        |
|----------------------|-------------|-------------|-------------|
| RF-Score-VS v2       | 8.60 ± 3.27 | 6.94 ± 3.18 | 6.27 ± 3.29 |
| rDock (dock)         | 6.81 ± 3.41 | 5.60 ± 3.01 | 5.23 ± 2.82 |
| rDock (dock_solv)    | 6.92 ± 3.33 | 5.80 ± 2.94 | 5.12 ± 2.69 |
| LigandRNA (2013)     | 6.67 ± 2.82 | 5.51 ± 2.31 | 4.92 ± 2.38 |
| LigandRNA (updated)  | 6.37 ± 2.74 | 5.49 ± 2.23 | 5.00 ± 2.36 |
| AnnapuRNA DL (2013)  | 5.39 ± 2.85 | 4.58 ± 2.47 | 4.37 ± 2.21 |
| AnnapuRNA DL (2016)  | 6.68 ± 3.04 | 4.82 ± 2.66 | 4.15 ± 2.24 |
| AnnapuRNA kNN (2013) | 6.06 ± 2.92 | 4.86 ± 2.56 | 4.14 ± 2.18 |
| AnnapuRNA kNN (2016) | 5.76 ± 2.87 | 5.00 ± 2.64 | 4.35 ± 2.32 |
| minimum RMSD         | 2.90 ± 1.76 | 2.90 ± 1.76 | 2.90 ± 1.76 |
| median RMSD          | 7.61 ± 2.70 | 7.61 ± 2.70 | 7.61 ± 2.70 |
