| AnnapuRNA                        | clustering                    | Best pose | S(3)  | S(5)  |
|----------------------------------|-------------------------------|-----------|-------|-------|
| DL (2013)                        | no clustering                 | 5.393     | 4.583 | 4.369 |
|                                  | clustering                    | 5.393     | 4.441 | 4.038 |
|                                  | clustering+averaging          | 5.331     | 4.407 | 3.993 |
|                                  | clustering+averaging+localopt | 5.390     | 4.455 | 4.028 |
| DL (2016)                        | no clustering                 | 6.683     | 4.824 | 4.148 |
|                                  | clustering                    | 6.683     | 4.645 | 3.972 |
|                                  | clustering+averaging          | 6.662     | 4.597 | 3.917 |
|                                  | clustering+averaging+localopt | 6.679     | 4.628 | 3.952 |
| kNN (2013)                       | no clustering                 | 6.059     | 4.855 | 4.138 |
|                                  | clustering                    | 6.059     | 4.452 | 3.959 |
|                                  | clustering+averaging          | 6.038     | 4.434 | 3.945 |
|                                  | clustering+averaging+localopt | 6.069     | 4.459 | 3.966 |
| kNN (2016)                       | no clustering                 | 5.759     | 5.003 | 4.348 |
|                                  | clustering                    | 5.759     | 4.593 | 3.986 |
|                                  | clustering+averaging          | 5.755     | 4.586 | 4.007 |
|                                  | clustering+averaging+localopt | 5.790     | 4.628 | 4.038 |
| All AnnapuRNA variants (average) | no clustering                 | 5.973     | 4.816 | 4.251 |
|                                  | clustering                    | 5.973     | 4.533 | 3.989 |
|                                  | clustering+averaging          | 5.947     | 4.506 | 3.966 |
|                                  | clustering+averaging+localopt | 5.982     | 4.542 | 3.996 |
